# Supplementary material for: Changes in Women’s Facial Skin Color over the Ovulatory Cycle are Not Detectable by the Human Visual System
Source: PLoS One. 2015 Jul 2;10(7):e0130093. doi: 10.1371/journal.pone.0130093 (PMC4489916; doi:10.1371/journal.pone.0130093)
Supplement: S1 Dataset — (XLSX) [file pone.0130093.s001.xlsx]

## Sheet: Sheet1
Participant ID	Cycle day (adjusted)	Cone: LW	Cone: MW	Cone: SW
1	1	0.48104	0.410841	0.25174
1	2.36842	0.445125	0.376242	0.233261
1	3.73684	0.4637	0.393974	0.244582
1	4.42105	0.467829	0.396406	0.242615
1	5.10526	0.487339	0.413263	0.251679
1	5.78947	0.486266	0.409089	0.25841
1	6.47368	0.522395	0.437708	0.273261
1	8.52632	0.514477	0.434025	0.263055
1	9.21053	0.510704	0.432766	0.263483
1	10.5789	0.4854	0.406961	0.254512
1	11.2632	0.490115	0.414413	0.251055
1	13.3158	0.50315	0.42293	0.257586
1	14	0.484798	0.406407	0.247857
1	15.0769	0.453978	0.382511	0.229603
1	16.1538	0.473451	0.396569	0.245172
1	21.5385	0.472181	0.393934	0.245916
1	22.6154	0.45664	0.384723	0.239214
2	1	0.459222	0.392687	0.261037
2	11.1111	0.455029	0.392754	0.257924
2	14	0.405267	0.348426	0.232434
2	15	0.468596	0.40256	0.263204
2	16	0.454479	0.391951	0.253147
3	11.6364	0.4403	0.373233	0.230223
3	12.8182	0.4063	0.341867	0.220176
3	14	0.433719	0.368746	0.236399
3	19	0.435911	0.370961	0.234713
3	20	0.427777	0.358087	0.224393
3	21	0.446478	0.375268	0.24172
3	26	0.459631	0.388688	0.240517
3	27	0.471285	0.399178	0.239884
3	28	0.42098	0.351304	0.226602
3	4.46667	0.459762	0.39107	0.240378
3	6.2	0.421042	0.353444	0.220516
3	10.5333	0.451208	0.385665	0.239905
3	11.4	0.447867	0.381932	0.235555
3	12.2667	0.432362	0.369323	0.231249
3	13.1333	0.396053	0.334207	0.212545
4	2.73333	0.390969	0.327893	0.198305
4	3.6	0.418947	0.353837	0.210735
4	4.46667	0.401645	0.338982	0.201473
4	5.33333	0.375243	0.313157	0.194552
4	9.66667	0.389972	0.328645	0.201167
4	11.4	0.386628	0.327496	0.199664
4	12.2667	0.410999	0.347412	0.214056
4	15.0769	0.379209	0.318968	0.198222
4	16.1538	0.39271	0.331264	0.202718
4	17.2308	0.387339	0.326703	0.201247
4	18.3077	0.392827	0.335783	0.20919
4	20.4615	0.369708	0.314887	0.194273
4	22.6154	0.388604	0.328561	0.201592
5	7.29032	0.416239	0.352405	0.236944
5	7.70968	0.409717	0.345191	0.230203
5	8.12903	0.382815	0.321548	0.218206
5	8.54839	0.393392	0.331749	0.22628
5	9.3871	0.411213	0.347048	0.231201
5	9.80645	0.438503	0.368155	0.24149
5	10.2258	0.427545	0.359702	0.24312
5	11.0645	0.435261	0.368333	0.246611
5	12.3226	0.439821	0.37072	0.247804
5	12.7419	0.460822	0.389007	0.255921
5	13.1613	0.407432	0.339642	0.228804
5	13.5806	0.425514	0.358213	0.238922
5	18.3077	0.450266	0.385129	0.25069
5	20.4615	0.432065	0.367833	0.2398
5	21.5385	0.424672	0.357026	0.234532
6	2.85714	0.428489	0.366501	0.24987
6	3.78571	0.484037	0.416276	0.281672
6	4.71429	0.386157	0.335372	0.220356
6	5.64286	0.448888	0.380763	0.261627
6	6.57143	0.46285	0.397129	0.269774
6	9.35714	0.465222	0.397905	0.269266
6	10.2857	0.48374	0.413403	0.277918
6	11.2143	0.4542	0.388949	0.269785
6	12.1429	0.473107	0.404838	0.27522
6	13.0714	0.477681	0.411016	0.277376
6	17.2308	0.482533	0.411428	0.280522
6	23.6923	0.418956	0.353195	0.249253
6	24.7692	0.427191	0.362966	0.255352
6	28	0.435746	0.371234	0.255068
7	1	0.497773	0.427303	0.276656
7	4.46667	0.505998	0.43596	0.277685
7	5.33333	0.494446	0.425213	0.27147
7	6.2	0.484399	0.416176	0.261284
7	7.06667	0.502043	0.430129	0.281569
7	9.66667	0.488605	0.417586	0.270596
7	10.5333	0.468586	0.399411	0.260952
7	12.2667	0.475903	0.409145	0.265078
7	13.1333	0.473545	0.404325	0.261282
7	16.1538	0.496136	0.426924	0.272522
7	18.3077	0.465012	0.395752	0.255454
7	19.3846	0.457758	0.392103	0.252545
7	20.4615	0.482522	0.415221	0.269114
7	23.6923	0.467847	0.400554	0.258897
7	24.7692	0.486033	0.416778	0.266145
7	26.9231	0.477718	0.410713	0.261941
8	3.6	0.36849	0.314625	0.213512
8	7.93333	0.36095	0.310797	0.210235
8	10.5333	0.398701	0.346984	0.234526
8	11.4	0.343702	0.291631	0.203423
8	12.2667	0.358977	0.304721	0.213657
8	19.3846	0.309984	0.25737	0.195149
9	1	0.350114	0.299432	0.205995
9	2	0.372055	0.31923	0.219059
9	6	0.37189	0.317543	0.220735
9	7	0.368185	0.317423	0.218569
9	9	0.364181	0.312115	0.21531
9	10	0.370465	0.315866	0.217179
9	11	0.397375	0.342669	0.230207
9	13	0.403362	0.347126	0.237977
9	15.0769	0.39519	0.340087	0.232377
9	17.2308	0.366717	0.311793	0.215564
9	21.5385	0.384839	0.324819	0.2245
9	22.6154	0.392557	0.335387	0.227901
9	23.6923	0.395086	0.336912	0.229019
9	24.7692	0.397808	0.340301	0.232861
10	5.64286	0.35569	0.303779	0.221425
10	6.57143	0.415606	0.357427	0.258795
10	8.42857	0.347927	0.296363	0.211105
10	12.1429	0.353188	0.303483	0.218328
10	13.0714	0.361853	0.309708	0.218211
10	14	0.344343	0.291444	0.209223
10	15.0769	0.350368	0.29912	0.214233
10	16.1538	0.369938	0.317923	0.224925
10	18.3077	0.403628	0.345443	0.240121
10	19.3846	0.33624	0.287866	0.205371
10	20.4615	0.360205	0.306953	0.211868
10	22.6154	0.370665	0.316421	0.219552
10	23.6923	0.361096	0.308553	0.215726
11	2.25806	0.376033	0.3233	0.213142
11	2.67742	0.387267	0.333089	0.218386
11	3.09677	0.358756	0.302069	0.204462
11	3.51613	0.366677	0.313984	0.208248
11	5.19355	0.353151	0.302424	0.200235
11	5.6129	0.371449	0.315872	0.216207
11	6.45161	0.367112	0.314109	0.20779
11	6.87097	0.346318	0.293469	0.198052
11	7.70968	0.383501	0.325597	0.21546
11	8.12903	0.347468	0.29479	0.197118
11	8.54839	0.36869	0.316144	0.207818
11	8.96774	0.346739	0.297564	0.203649
11	9.3871	0.356261	0.304555	0.202617
11	9.80645	0.348386	0.295212	0.201456
11	11.0645	0.345067	0.295666	0.198295
11	12.3226	0.365201	0.31142	0.205524
11	13.5806	0.39222	0.334862	0.225476
11	14	0.387523	0.327911	0.22119
11	15.0769	0.387093	0.324694	0.218927
11	16.1538	0.357175	0.299489	0.201046
11	17.2308	0.381829	0.321058	0.21464
12	11.6364	0.364024	0.312323	0.233703
12	12.8182	0.395321	0.339527	0.254997
12	13.4091	0.384789	0.332607	0.250026
12	17.2308	0.364404	0.314118	0.245195
12	18.3077	0.385583	0.329311	0.245542
12	20.4615	0.380734	0.325573	0.247831
12	23.6923	0.37071	0.317848	0.240057
12	28	0.388328	0.333429	0.247566
12	5.58824	0.414525	0.357941	0.272799
12	6.35294	0.396659	0.3365	0.354914
12	7.11765	0.386432	0.33147	0.254111
12	7.88235	0.407685	0.352079	0.265744
12	8.64706	0.398864	0.3416	0.255188
13	7.5	0.360561	0.307521	0.210985
13	12.5556	0.360078	0.303861	0.208683
13	14	0.334778	0.27957	0.194971
13	15.0769	0.322851	0.271697	0.187234
13	19.3846	0.356276	0.296704	0.205577
13	24.7692	0.350811	0.29218	0.201009
14	1	0.370641	0.323062	0.207051
14	2.52941	0.392551	0.342361	0.218009
14	3.29412	0.380236	0.331403	0.213108
14	4.05882	0.394127	0.342068	0.217183
14	5.58824	0.407643	0.353294	0.220026
14	6.35294	0.376188	0.326825	0.207547
14	7.11765	0.387651	0.337134	0.214581
14	8.64706	0.393848	0.342344	0.217615
14	9.41176	0.401059	0.349436	0.224878
14	10.9412	0.396519	0.342152	0.217577
14	11.7059	0.394557	0.339138	0.212868
14	12.4706	0.407795	0.350699	0.219406
14	13.2353	0.398294	0.345142	0.217651
14	14	0.402423	0.348039	0.219943
14	15	0.377906	0.327139	0.216733
14	16	0.380036	0.329562	0.217091
14	17	0.387424	0.33245	0.214593
15	1.86667	0.330836	0.280818	0.206398
15	3.6	0.34552	0.290906	0.210286
15	7.06667	0.368483	0.317491	0.222816
15	11.4	0.384058	0.331825	0.237772
15	12.2667	0.34677	0.291165	0.206303
15	13.1333	0.352624	0.298935	0.207927
15	14	0.355737	0.300565	0.215822
15	15.0769	0.371141	0.318983	0.217867
15	16.1538	0.3693	0.313491	0.216364
15	20.4615	0.375444	0.318599	0.219265
15	21.5385	0.3418	0.290087	0.208857
15	26.9231	0.317479	0.269139	0.195049
18	3.95455	0.494676	0.425198	0.279936
18	5.72727	0.453317	0.38428	0.257368
18	8.09091	0.465616	0.397808	0.263418
18	9.86364	0.456	0.388527	0.259933
18	12.2273	0.473762	0.406757	0.264408
18	14	0.467595	0.399275	0.262195
18	15.1667	0.475961	0.406964	0.266102
18	16.3333	0.44802	0.377775	0.250196
18	24.5	0.451983	0.387967	0.253835
22	12	0.466667	0.402898	0.263893
22	14	0.517173	0.44555	0.293584
22	16	0.538487	0.466795	0.299693
22	18	0.580695	0.505142	0.323578
22	12	0.524723	0.457483	0.298592
22	13	0.577962	0.503756	0.333502
22	15	0.513231	0.445368	0.291199
22	17	0.518168	0.45024	0.300932
22	20	0.524656	0.454167	0.299821
23	3.70833	0.462118	0.392095	0.252049
23	4.79167	0.448017	0.372702	0.249686
23	6.41667	0.445995	0.37935	0.244327
23	7.5	0.468015	0.397198	0.259998
23	8.04167	0.443009	0.372898	0.244323
23	8.58333	0.467189	0.390319	0.263931
23	9.66667	0.510855	0.434226	0.282985
23	11.2917	0.491909	0.416973	0.280479
23	11.8333	0.431904	0.358498	0.240796
23	12.375	0.43548	0.363837	0.244195
23	13.4583	0.437715	0.368797	0.24682
23	14	0.448056	0.371966	0.246459
23	15.1667	0.447163	0.376299	0.247922
23	16.3333	0.476096	0.40303	0.260385
23	18.6667	0.427459	0.356881	0.236548
23	19.8333	0.468989	0.401315	0.258757
23	24.5	0.447639	0.376085	0.244611
23	25.6667	0.442228	0.365984	0.242781
24	2.625	0.494074	0.457993	0.458409
24	3.4375	0.457993	0.458409	0.506414
24	4.25	0.458409	0.506414	0.454524
24	6.6875	0.506414	0.454524	0.517783
24	7.5	0.454524	0.517783	0.5981
24	8.3125	0.517783	0.5981	0.479546
24	9.125	0.5981	0.479546	0.542309
24	9.9375	0.479546	0.542309	0.442111
24	12.375	0.542309	0.442111	0.44652
24	13.1875	0.442111	0.44652	0.490121
24	14	0.44652	0.490121	0.461044
24	16.5455	0.490121	0.461044	0.480222
24	21.6364	0.461044	0.480222	0.48895
24	22.9091	0.480222	0.48895	0.484179
24	24.1818	0.48895	0.484179	0.501738
25	8.42857	0.49699	0.421426	0.296793
25	9.35714	0.501036	0.426403	0.296002
25	10.2857	0.47809	0.41012	0.289168
25	11.2143	0.490912	0.420023	0.291379
25	13.0714	0.467398	0.398657	0.284849
25	15.8667	0.473106	0.402187	0.286856
25	16.8	0.520481	0.438854	0.308805
25	17.7333	0.532163	0.454571	0.322102
25	18.6667	0.485856	0.414398	0.297756
25	21.4667	0.476885	0.404698	0.281164
25	28	0.48027	0.405907	0.275724
26	2.36842	0.507477	0.435881	0.311624
26	3.05263	0.453493	0.388751	0.271856
26	3.73684	0.579422	0.502358	0.350607
26	5.78947	0.498009	0.429171	0.296268
26	8.52632	0.499037	0.430366	0.301529
26	13.3158	0.462101	0.396548	0.269601
26	15.4	0.482409	0.417248	0.295766
26	17.5	0.438712	0.377538	0.256118
26	20.3	0.503898	0.435475	0.305879
26	21	0.47333	0.407199	0.28657
26	25.2	0.50882	0.436663	0.295103
26	27.3	0.481319	0.415987	0.293742
27	1	0.39789	0.329119	0.227066
27	3.05263	0.498282	0.419171	0.270523
27	3.73684	0.416365	0.348295	0.235198
27	5.10526	0.403656	0.339645	0.22344
27	7.84211	0.450642	0.377602	0.24265
27	8.52632	0.418422	0.351116	0.22881
27	9.21053	0.437173	0.364889	0.237043
27	10.5789	0.457708	0.389962	0.254429
27	11.2632	0.405203	0.335074	0.21928
27	12.6316	0.394102	0.327802	0.213545
27	13.3158	0.40305	0.333727	0.215117
27	16	0.431965	0.357857	0.234851
27	20	0.402483	0.33725	0.223277
27	22	0.436187	0.367758	0.239085
